# Supplementary material
Source: publisher figshare collection journal article supplement (https://acs.figshare.com/ndownloader/files/3718480)
Supplement: Supplementary file 1 [file 3718480]

## **Supporting Information**

### **Structure Interlacing and Pore Engineering of $\text{Zn}_2\text{GeO}_4$ Nanofibers for Achieving High Capacity and Rate Capability as an Anode Material of Lithium Ion Batteries**

Wei Wang, Jinwen Qin, Minhua Cao\*

Key Laboratory of Cluster Science, Ministry of Education of China, Beijing Key  
Laboratory of Photoelectronic/Electrophotonic Conversion Materials, Department of  
Chemistry, Beijing Institute of Technology, Beijing 100081, P. R. China.

TEL: (+86) 10-68918468; E-mail: caomh@bit.edu.cn

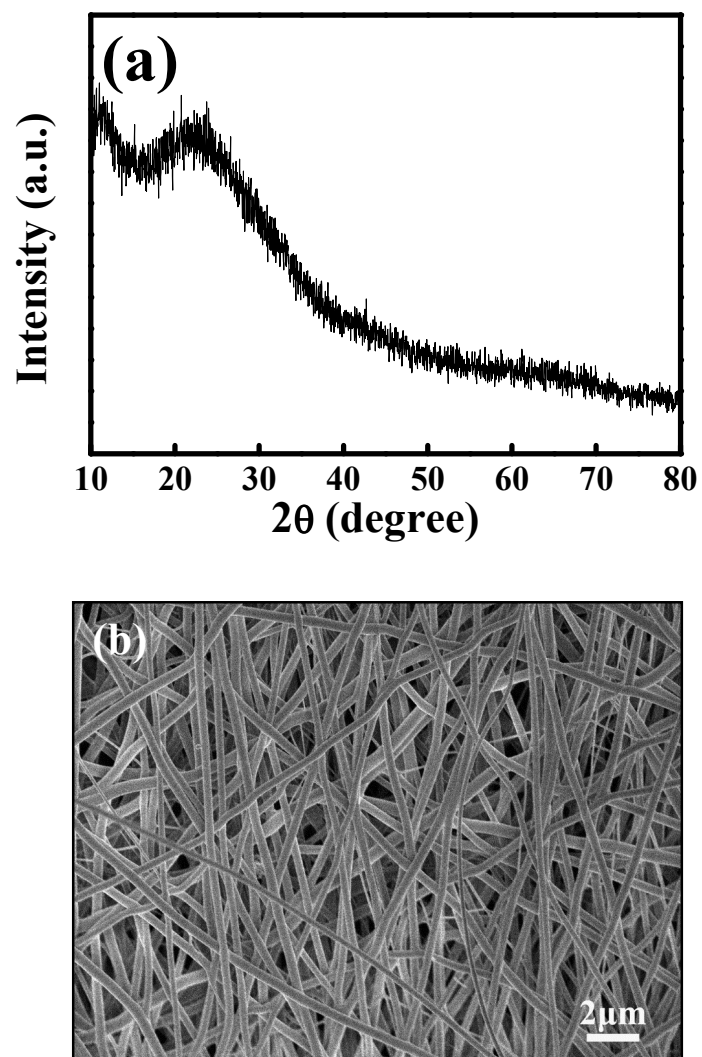

**Figure S1** (a) XRD pattern and (b) SEM image of as-electrospun Zn-Ge-PVP precursor.

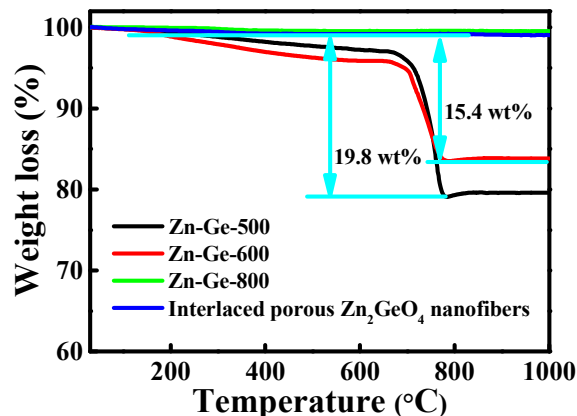

**Figure S2** TG curve of the interlaced porous Zn<sub>2</sub>GeO<sub>4</sub> nanofiber electrode as well as Zn-Ge-500, Zn-Ge-600, Zn-Ge-800 in air.

For quantifying the amount of carbon in the products, TGA was carried out in air. The samples were heated from 25 to 1000 °C at a rate of 10 °C min<sup>-1</sup>. **Figure S2** shows the TGA curve of the interlaced porous Zn<sub>2</sub>GeO<sub>4</sub> nanofiber electrode as well as Zn-Ge-500, Zn-Ge-600, Zn-Ge-800. A slight weight loss observed before 200 °C was assigned to water absorbed on the surface and in the inner of the nanofibers. The large weight loss between 450 °C and 800 °C was the eliminating of carbon from the products. As can be seen from equation (1), the carbon content in the composite was all burned out into CO<sub>2</sub> during the heating process, while the Zn<sub>2</sub>GeO<sub>4</sub> was decomposed into ZnO and GeO<sub>2</sub> after 800 °C with no weight loss. So, the final weight entirely corresponds to ZnO and GeO<sub>2</sub>, from which the weight of carbon can be calculated. By using the equation (2), it was estimated that the amount of carbon in the Zn-Ge-500 and Zn-Ge-600 were about 19.8 wt% and 15.4 wt%, respectively. While for the interlaced porous Zn<sub>2</sub>GeO<sub>4</sub> nanofiber and Zn-Ge-800, there is no carbon in the samples.

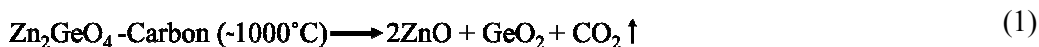

$$\text{Carbon (wt\%)} = 100\% \times \frac{\text{initial weight} - \text{final weight}}{\text{initial weight}} \quad (2)$$

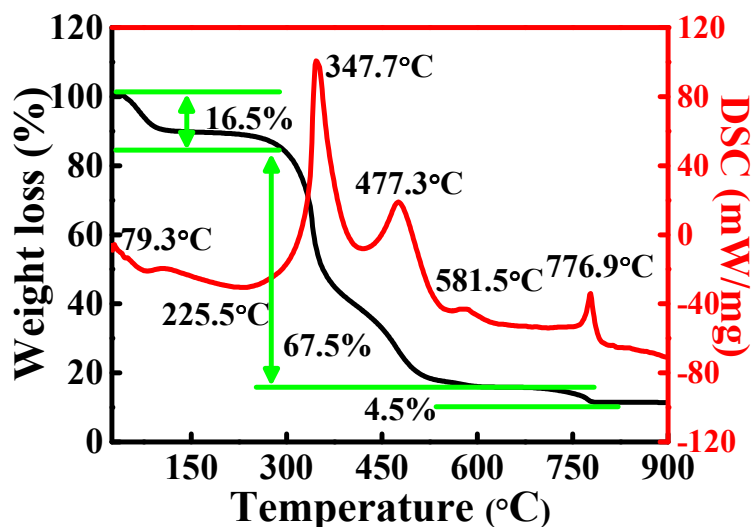

**Figure S3** TG-DSC curves of Zn-Ge-PVP precursor recorded in air atmosphere.

As can be clearly seen, the initial 16.5% weight loss in the low temperature range (25–300 °C) can be assigned to the adsorbed water and residual solvent (DMF). The sharp peak at 347.7°C is assigned to the decomposition of PVP, while the prominent peaks at around 477.3°C and 581.5 °C correspond to the formation of  $\text{Zn}_2\text{GeO}_4$  with 67.5% total weight loss (300–600 °C). And it can be seen that there is almost no weight loss between 600 °C and 700 °C. As the temperature continues to increase, a peak at about 776.9 °C is detected that is related to the partial decomposition of the  $\text{Zn}_2\text{GeO}_4$  phase and the emergence of  $\text{GeO}_2$  accompanies by 4.5% weight loss (700–900°C).

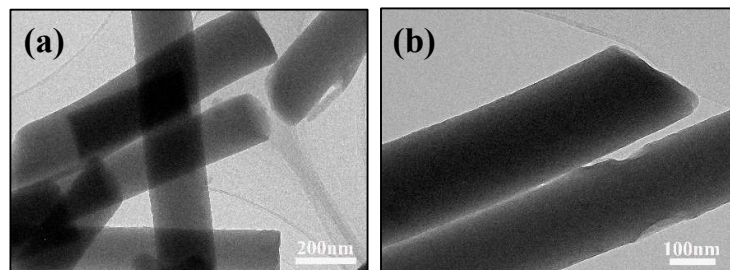

**Figure S4** (a,b) TEM images of Zn-Ge-600 with different magnifications.

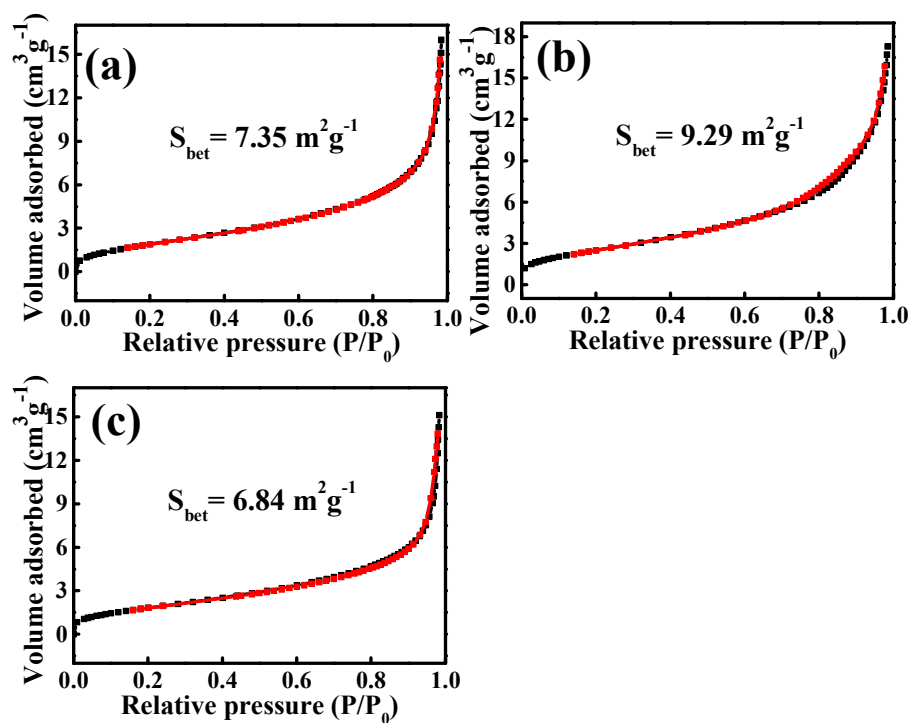

**Figure S5** Nitrogen adsorption-desorption isotherms of Zn-Ge-500 (a), Zn-Ge-600 (b) and Zn-Ge-800 (c).

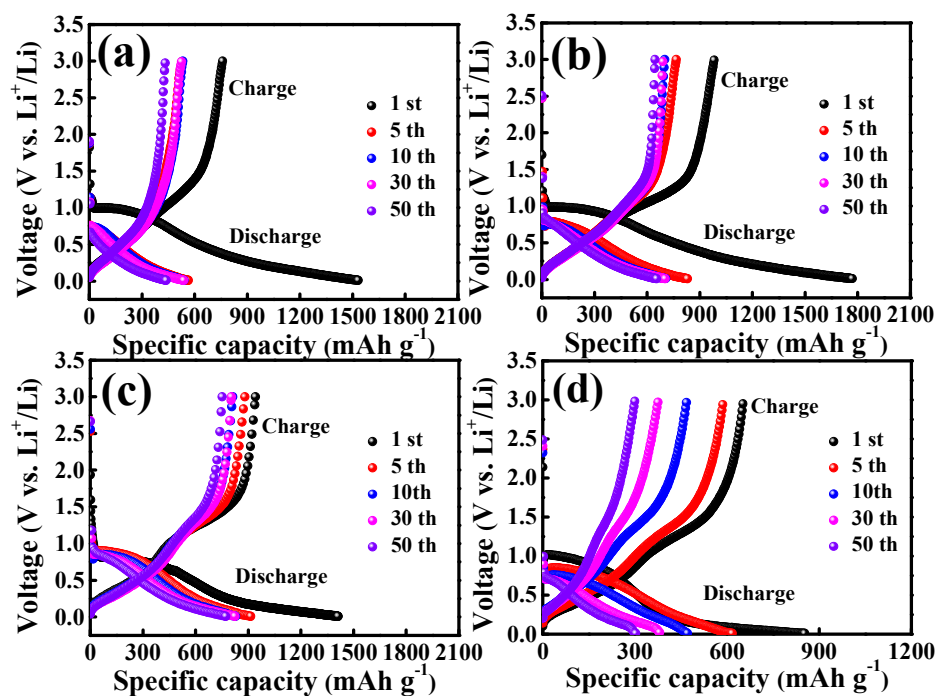

**Figure S6** Discharge and charge profiles of Zn-Ge-500 (a), Zn-Ge-600 (b), Zn-Ge-800 (c), and  $\text{Zn}_2\text{GeO}_4$  nanorods (d) at a current density of  $100 \text{ mA g}^{-1}$  between 0.01 and 3.00 V for 1st, 5th, 10th, 30<sup>th</sup> and 50th cycles.

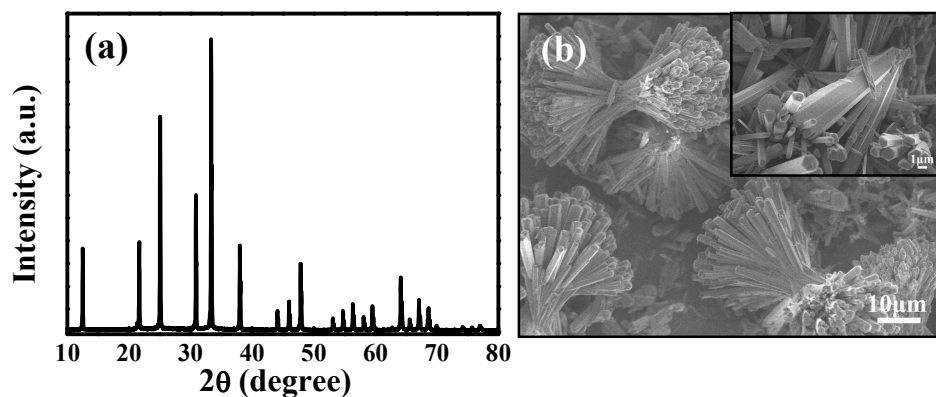

**Figure S7** (a) XRD pattern and (b) SEM image of pure  $\text{Zn}_2\text{GeO}_4$  nanorods.

### Equivalent electrical circuit

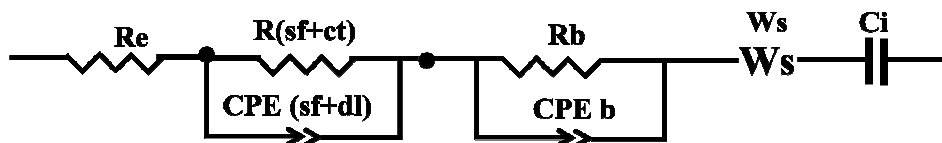

**Figure S8** Equivalent electrical circuit corresponding to the results in Figure 5d.

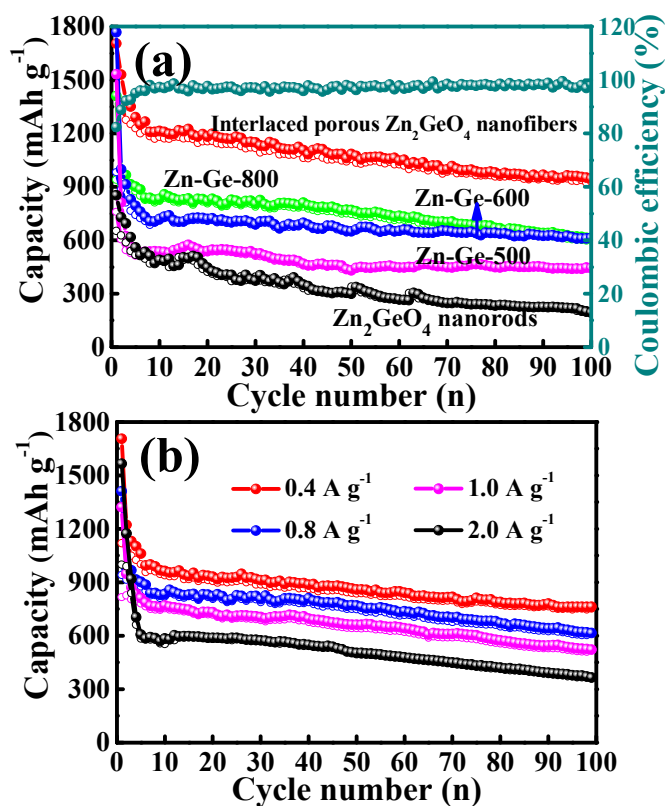

**Figure S9** (a) Comparison of cycle performance of the interlaced porous Zn<sub>2</sub>GeO<sub>4</sub> nanofiber electrode as well as Zn-Ge-500, Zn-Ge-600, Zn-Ge-800 and Zn<sub>2</sub>GeO<sub>4</sub> nanorods cycled at 0.2 A g<sup>-1</sup> for 100 cycles. (b) The cycling performance of interlaced porous Zn<sub>2</sub>GeO<sub>4</sub> nanofiber electrode at 0.4, 0.8, 1.0 and 2.0 A g<sup>-1</sup> for 100 cycles.
